# Supplementary material
Source: PubMed Central journal article supplement (PMC3395086)
Supplement: emboj2012120s1.pdf [file emboj2012120s1.pdf]

## Supplemental Information

Sina Henrichs<sup>2, 12</sup>, Bangjun Wang<sup>1, 2, 3, 12</sup>, Yoichiro Fukao<sup>11</sup>, Jinsheng Zhu<sup>1</sup>, Laurence Charrier<sup>1</sup>, Aurélien Bailly<sup>1, 2</sup>, Sophie C. Oehring<sup>2, 10</sup>, Miriam Linnert, Matthias Weiwad<sup>4</sup>, Anne Endler<sup>2, 9</sup>, Paolo Nanni<sup>8</sup>, Stephan Pollmann<sup>5</sup>, Stefano Mancuso<sup>6</sup>, Alexander Schulz<sup>3</sup>, Markus Geisler<sup>1, 2, 13</sup>

<sup>1</sup> University of Fribourg, Department of Biology - Plant Biology, Fribourg, Switzerland

<sup>2</sup> University of Zurich and Zurich-Basel Plant Science Center, Institute of Plant, Biology, Zurich, Switzerland

<sup>3</sup> Department of Plant Biology and Biotechnology, University of Copenhagen, Frederiksberg, Denmark

<sup>4</sup> Max-Planck-Forschungsstelle für Enzymologie der Proteinfaltung, Halle (Saale), Germany

<sup>5</sup> Ruhr-Universität Bochum, Lehrstuhl für Pflanzenphysiologie, Germany

<sup>6</sup> Department of Horticulture, University of Firenze, Sesto Fiorentino, Italy

<sup>7</sup> Laboratory of Cell Dynamics, Graduate School of Bioagricultural Sciences Nagoya University, Nagoya, Japan

<sup>8</sup> Functional Genomics Center Zurich, University of Zurich and Swiss Federal Institute of Technology, Zurich, Switzerland

<sup>9</sup> present address: Max Planck Institute of Molecular Plant Physiology, Potsdam-Golm, Germany

<sup>10</sup> present address: Medical Parasitology & Infection Biology, Swiss Tropical and Public Health Institute, Basel, Switzerland

<sup>11</sup> Plant Science Education Unit, Graduate School of Biological Sciences, Nara Institute of Science and Technology, Nara, Japan

<sup>12</sup> sharing co-authorship

<sup>13</sup> to whom correspondence should be addressed: [markus.geisler@unifr.ch](mailto:markus.geisler@unifr.ch)

### Supplementary Figure Legends

#### Figure S1: TAPa-tagged TWD1 functionally complements *twd1*.

(A) Phenotype of homozygous *twd1-3* transformed with 35S:TAPa-TWD1 (no. 3, line 3 and no. 5, line 5) in comparison to Columbia wild-type (Col Wt) 45 dag.

(B) Western blot verification of TAP1-TWD1 expression using anti-MYC.

(C) Auxin efflux from protoplasts of *twd1-3* complemented with 35S:TAPa-TWD1 (TAPa-TWD1) is restored to wild-type (Col Wt) levels (mean  $\pm$  SE; n = 4). Significant differences (unpaired *t* test with Welch's correction,  $p < 0.05$ ) to wild type are indicated by an asterisk.

(D) Protein sequences of TWD1 and PID peptides with protein coverages identified by MS/MS after TAPa-TWD1 co-immunoprecipitation.

(E) Phenotype of homozygous *twd1-3* complemented with C- (TWD1-Rluc) and N-terminally tagged *Renilla* luciferase (Rluc-TWD1) in comparison to Columbia wild-type (Col Wt) 40 dag.

**Figure S2: Co-expression and mutagenesis does not significantly alter location and expression of ABCB1 in yeast**

(A) Co-expression with PID, MPID or BIN2 does not significantly alter plasma membrane location of ABCB1-YFP as revealed by Western analysis using anti-GFP and anti-PMA1 directed against plasma membrane marker, H<sup>+</sup>-ATPase, after linear sucrose gradient centrifugation. Peak fractions are marked by red asterisks.

(B) S634A and S634E mutagenesis does not significantly alter plasma membrane location of ABCB1-YFP as revealed by Western analysis using anti-GFP and anti-PMA1 directed against plasma membrane marker, H<sup>+</sup>-ATPase, after linear sucrose gradient centrifugation. Peak fractions are marked by red asterisks.

(C) S634A and S634E mutagenesis does not significantly alter expression of ABCB1-YFP. Each 20  $\mu$ g of protein was subjected to PAGE and Western analysis using anti-GFP and anti-PMA1 directed against plasma membrane marker, H<sup>+</sup>-ATPase.

(D) S634A and S634E mutagenesis does not significantly alter expression and location of ABCB1-YFP that localized primarily to raft-like structures surrounding the plasma membrane (Bailly et al, 2008). Bars, 2  $\mu$ m.

**Figure S3: Co-expression and mutagenesis does not significantly alter location and expression of ABCB1 in yeast and tobacco**

(A) Co-expression of ABCB1-MYC with PID-FLAG (PID), TWD1-YFP (TWD1), WAG1-YFP (WAG1) and PID-FLAG/TWD1-YFP (PID + TWD1) does not significantly alter expression of ABCB1-YFP. Each 10  $\mu$ g of protein was subjected to PAGE and Western analysis using anti-MYC and anti-AHA2, directed against plasma membrane marker, H<sup>+</sup>-ATPase.

(B-C) Time-course of auxin efflux from *PID* gain- and loss-of-function protoplasts. IAA (B) and NAA efflux (C) from *Arabidopsis pid* protoplasts is strongly enhanced while *PID* gain-of function has in agreement with described phenotypes only a non-significant effect (means  $\pm$  SE; n = 3). 7.5 min. values were taken for bar presentation in Fig. 3C.

(D-E) 35S:WAG1-YFP (D, WAG1-YFP) and 35S:TWD1-GFP (E, TWD1-GFP) localize to the plasma membrane of *N. benthamiana* protoplasts isolated 4 days after leaf infiltration. Bars, 5  $\mu$ m.

(F-G) 35S:ABCB1-YFP co-localizes with 35S:PID-GFP (F, PID-GFP) and 35S:TWD1-GFP (G, TWD1-GFP) on the plasma membrane of *N. benthamiana* protoplasts isolated 4 days after leaf infiltration. Bars, 5  $\mu$ m.

(H) Co-transfection of PID (PID-GFP) and TWD1 (TWD1-YFP) in *N. benthamiana* protoplasts does not significantly alter ABCB1 (ABCB1-CFP) location in comparison to vector control co-expression. Note co-localization of ABCB1, TWD1 and PID on the plasma membrane of tobacco protoplasts

(lower row; insets in upper row show indicated details at higher magnification).  
Bar, 10  $\mu\text{m}$ .

**Figure S4: Inhibition of *in vitro* auto-phosphorylation of PID-GST by quercetin correlates with inhibition of MBP trans-phosphorylation**

(A-B) Coomassie stains (left panels) of non-phosphorylated PID (PID) was used as loading control (A). Autoradiographies (right panels) of autophosphorylated PID (PID-P), presumably represented by the upper band in the Coomassie stain (Christensen et al, 2000), were quantified (B) and signal intensities were plotted against solvent controls (lower panel; means  $\pm$  SE; n = 3). Significant differences (unpaired *t* test with Welch's correction,  $p < 0.05$ ) to solvent controls are indicated by asterisks. Note that in contrast to PID autophosphorylation (Fig. 5), chelerythrine has only a slight effect on MBP trans-phosphorylation.

**Figure S5: The ABCB1 linker domain is a target of protein phosphorylation**

Overview of ABCB1 linker (amino acid 607-680, grey background) phosphorylation sites either predicted *in silico* using NetPhos (red letters) or identified by phosphoproteomics (black P, (Benschop et al, 2007; Nuhse et al, 2004); red P, this study). *In vitro* verification of putative linker phosphorylation sites using synthetic linker peptides (blue background) and mammalian PKC; numbers of PKC phosphorylation sites (X x P) identified by MS/MS are indicated.

**Figure S6: Staurosporine and phorbol ester do not rescue the *pin2* agravitropic phenotype.**

Root bending analysis after 12h kinase inhibitor treatment (100 nM quercetin, 400 nM chelerythrine, 50 nM staurosporine, 10  $\mu\text{M}$  phorbol ester). The length of each bar represents the mean percentages  $\pm$  SD of seedlings showing the same direction of root growth of at least three independent experiments; numbers correspond to the mean percent occurrence of 60 and 90° bending (sum of 60 and 90° sectors); nd, experiment not done.

**Figure S7: Protein kinase inhibitors do not significantly alter ABCB1-, ABCB19, PIN1 and PIN2 root locations.**

Arrows mark ectopic PIN1 expression at epidermal and cortical PIN2 locations caused by quercetin and chelerythrine, and enhanced ABCB1 expression in Columella cells upon chelerythrine treatments, as well as slightly elevated ABCB19 expression in the stele induced by quercetin and chelerythrine.

**Figure S8: Model of PID-ABCB-TWD1 interaction and ABCB1 linker regulation**

**(A)** Simplified model of the dual, counter-active, regulatory impact of PID on ABCB activity. In the absence of TWD1, PID has a positive (+) regulatory effect on ABCB activity, most probably by S634 linker phosphorylation. Moreover, TWD1 functions in recruiting PID for ABCB1 linker phosphorylation resulting in block of auxin efflux (-). This negative regulatory role on auxin transport *in planta* is supported by Arabidopsis protoplast efflux data (Fig. 3C), however, target residues phosphorylated by PID have not yet been identified. Quercetin (Quer) binds to PID resulting in PID inhibition. Functional domains of TWD1 are in blue (FKBD), green (TPR), yellow (calmodulin-binding domain) and grey (in-plane membrane anchor).

**(B)** Inward-facing structural model of the *Arabidopsis* ABCB1 modeled on the crystal structure of murine ABCB1/PGP1 (PDBID 3G5U) indicating a location of the linker region (orange) with S634 (depicted as calotte) between N- and C-terminal NBDs (Bailly et al, 2012).

**(C)** Impact of the linker location on electrostatic surface potentials. Bottom view into the transmembrane region of the translocation chamber (dark grey in B.) displaying electrostatic surface potential of AtABCB1 with (+ linker) and without linker domain (- linker). Note negative shift of surface potentials in the absence of the ABCB1 linker. Scale of legend, +/- 10 kT.

**Table S1: TWD1 interactors identified by co-immunoprecipitation using TAP-TWD1 as bait followed by shotgun MS/MS analysis**

MASCOT-identified vector control proteins and TAP-TWD1 proteins with their AGI codes (prot\_acc), protein scores (prot\_score) and protein cover (prot\_cover). Proteins with a score above 30 that are not found in vector controls are colored in yellow and summarized in detail in Fig. 1A.

## Supplemental references

Bailly A, Sovero V, Vincenzetti V, Santelia D, Bartnik D, Koenig BW, Mancuso S, Martinoia E, Geisler M (2008) Modulation of P-glycoproteins by auxin transport inhibitors is mediated by interaction with immunophilins. *J Biol Chem* **283**: 21817-21826

Bailly A, Yang Y, Martinoia E, Geisler M, Murphy A (2012) Plant lessons: Understanding substrate specificity through structural modeling of ABCBs. *Front Plant Sci* **2**: 1-14

Benschop JJ, Mohammed S, O'Flaherty M, Heck AJ, Slijper M, Menke FL (2007) Quantitative phosphoproteomics of early elicitor signaling in Arabidopsis. *Mol Cell Proteomics* **6**: 1198-1214

Christensen SK, Dagenais N, Chory J, Weigel D (2000) Regulation of auxin response by the protein kinase PINOID. *Cell* **100**: 469-478

Nuhse TS, Stensballe A, Jensen ON, Peck SC (2004) Phosphoproteomics of the Arabidopsis plasma membrane and a new phosphorylation site database. *Plant Cell* **16**: 2394-2405

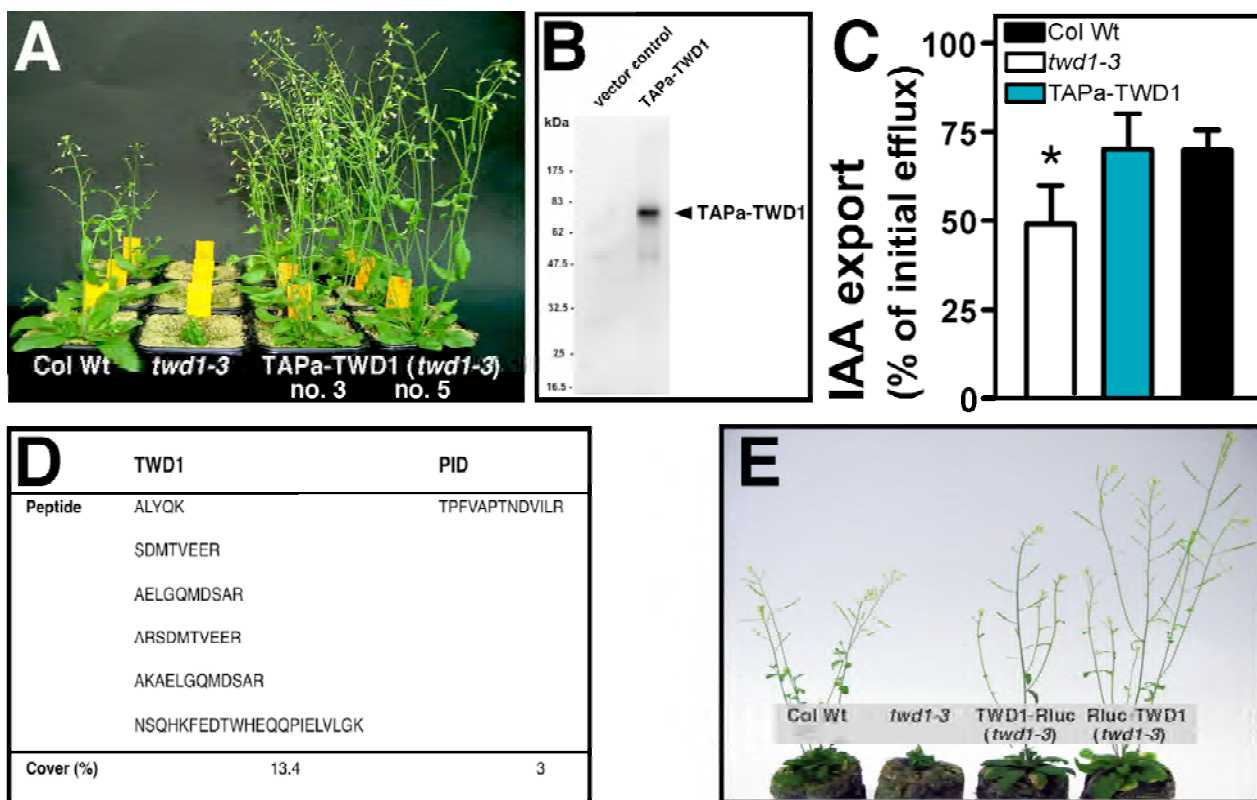

Henrichs et al. Fig. S1

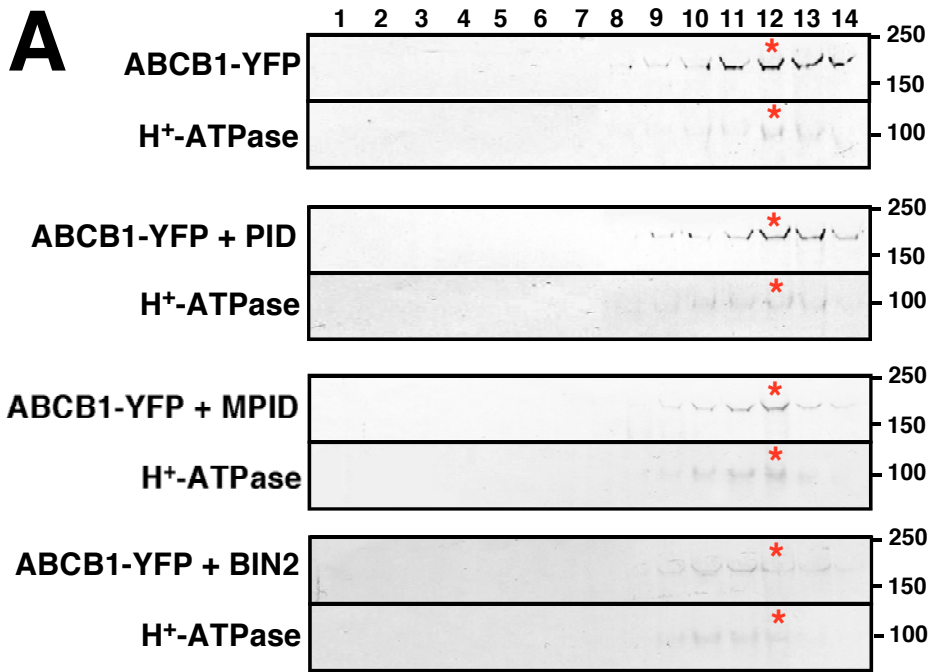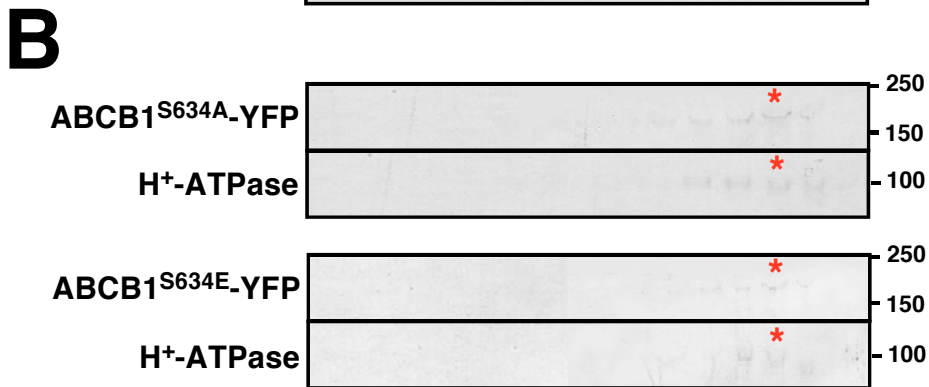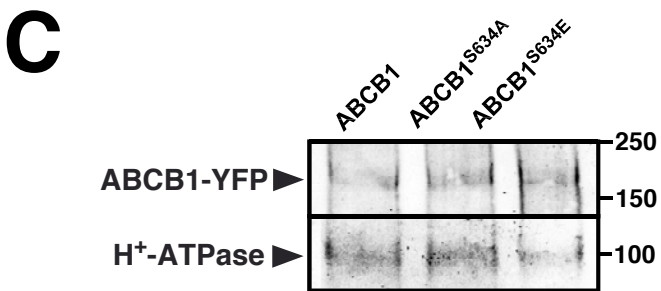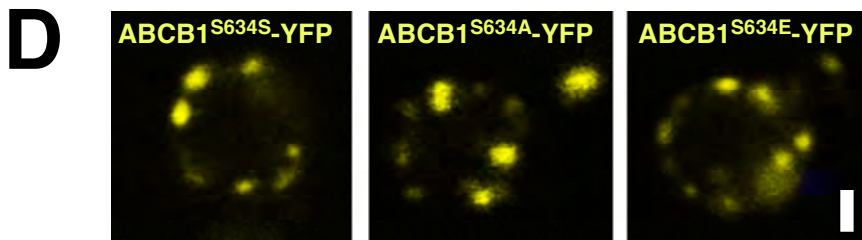

Henrichs et al. Fig. S2

**A**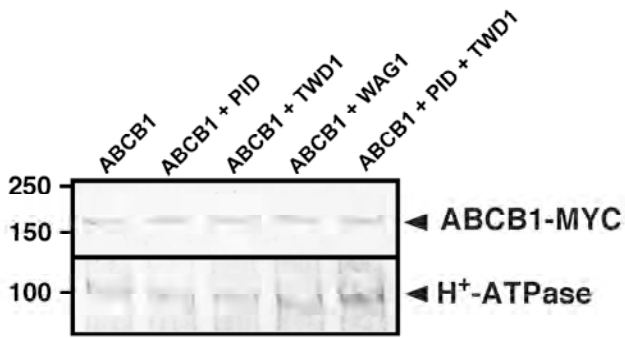**B**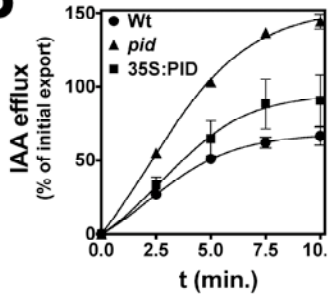**C**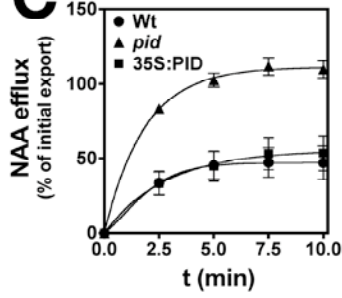**D**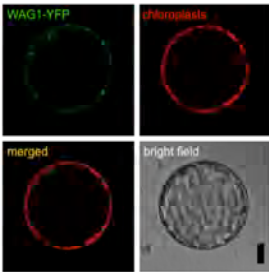**E**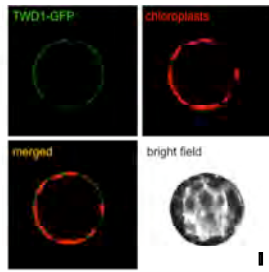**F**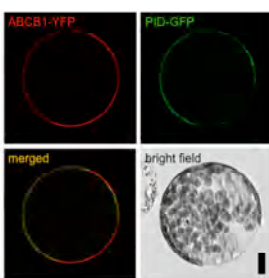**G**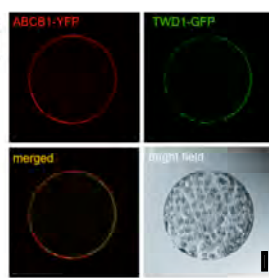**H**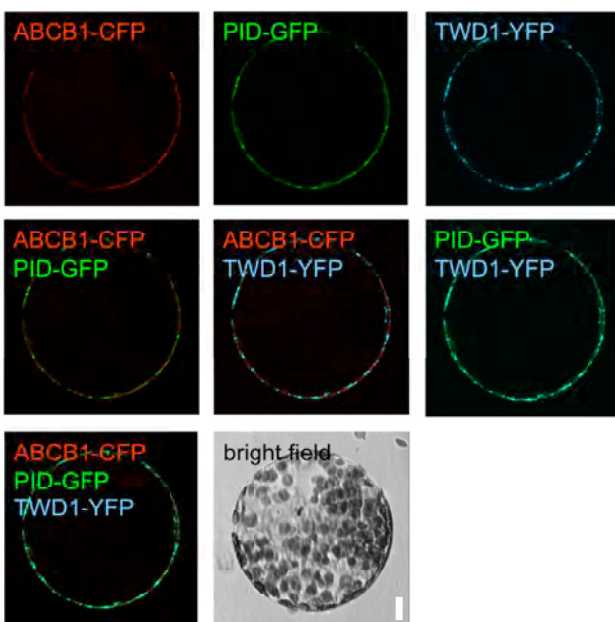



**A**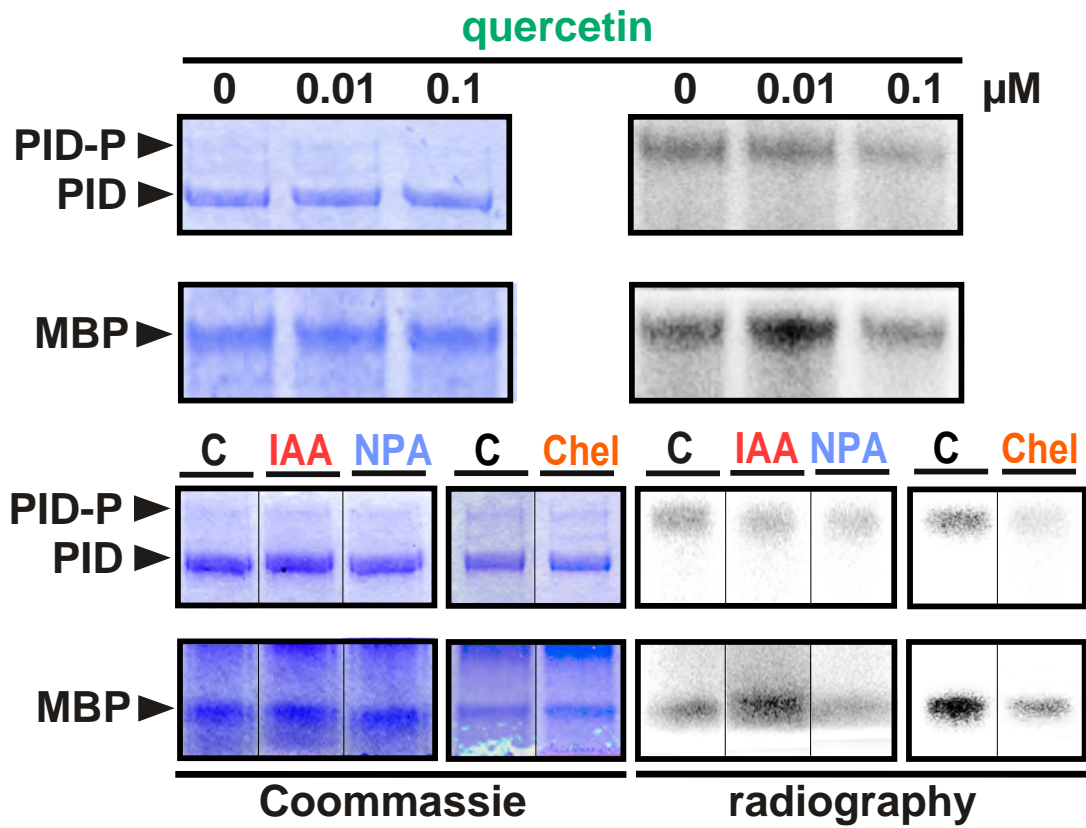**B**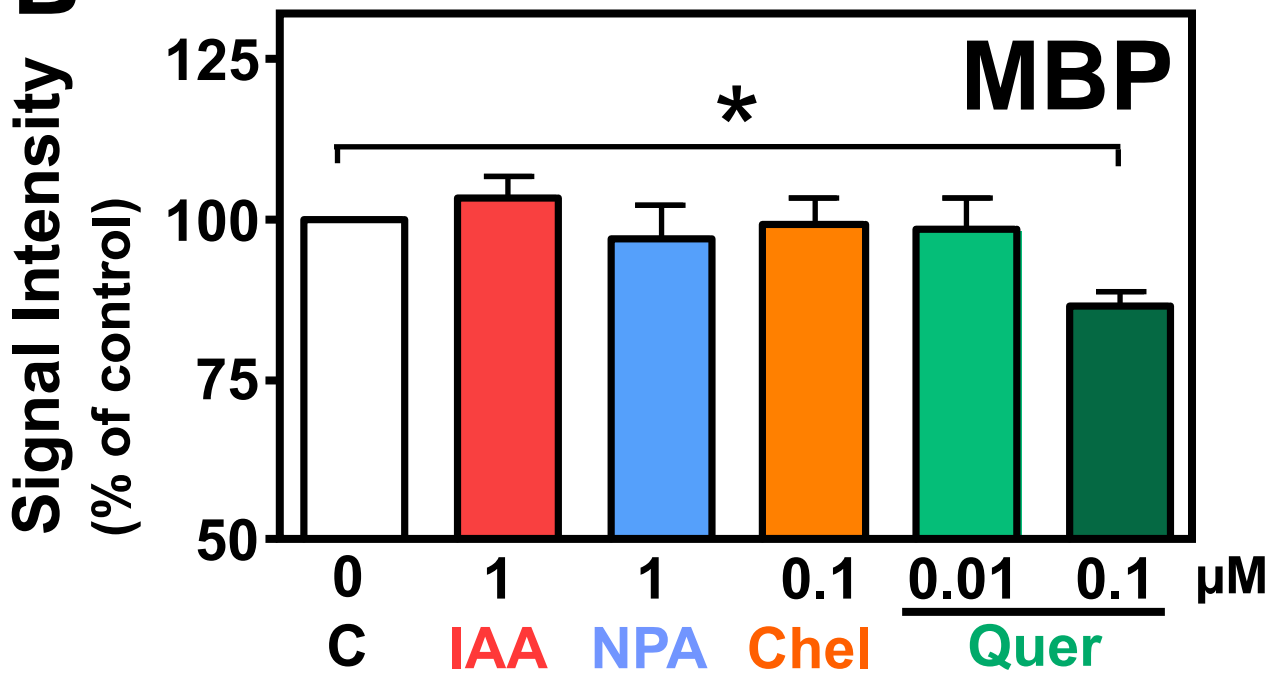

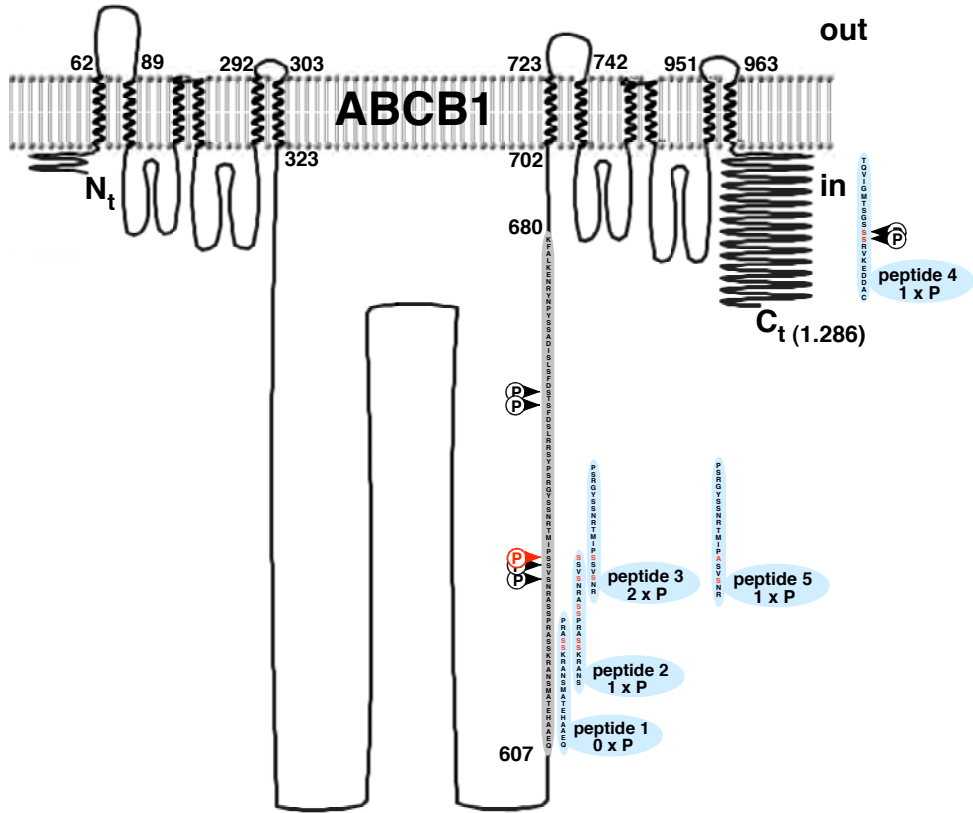

Henrichs et al. Fig. S5

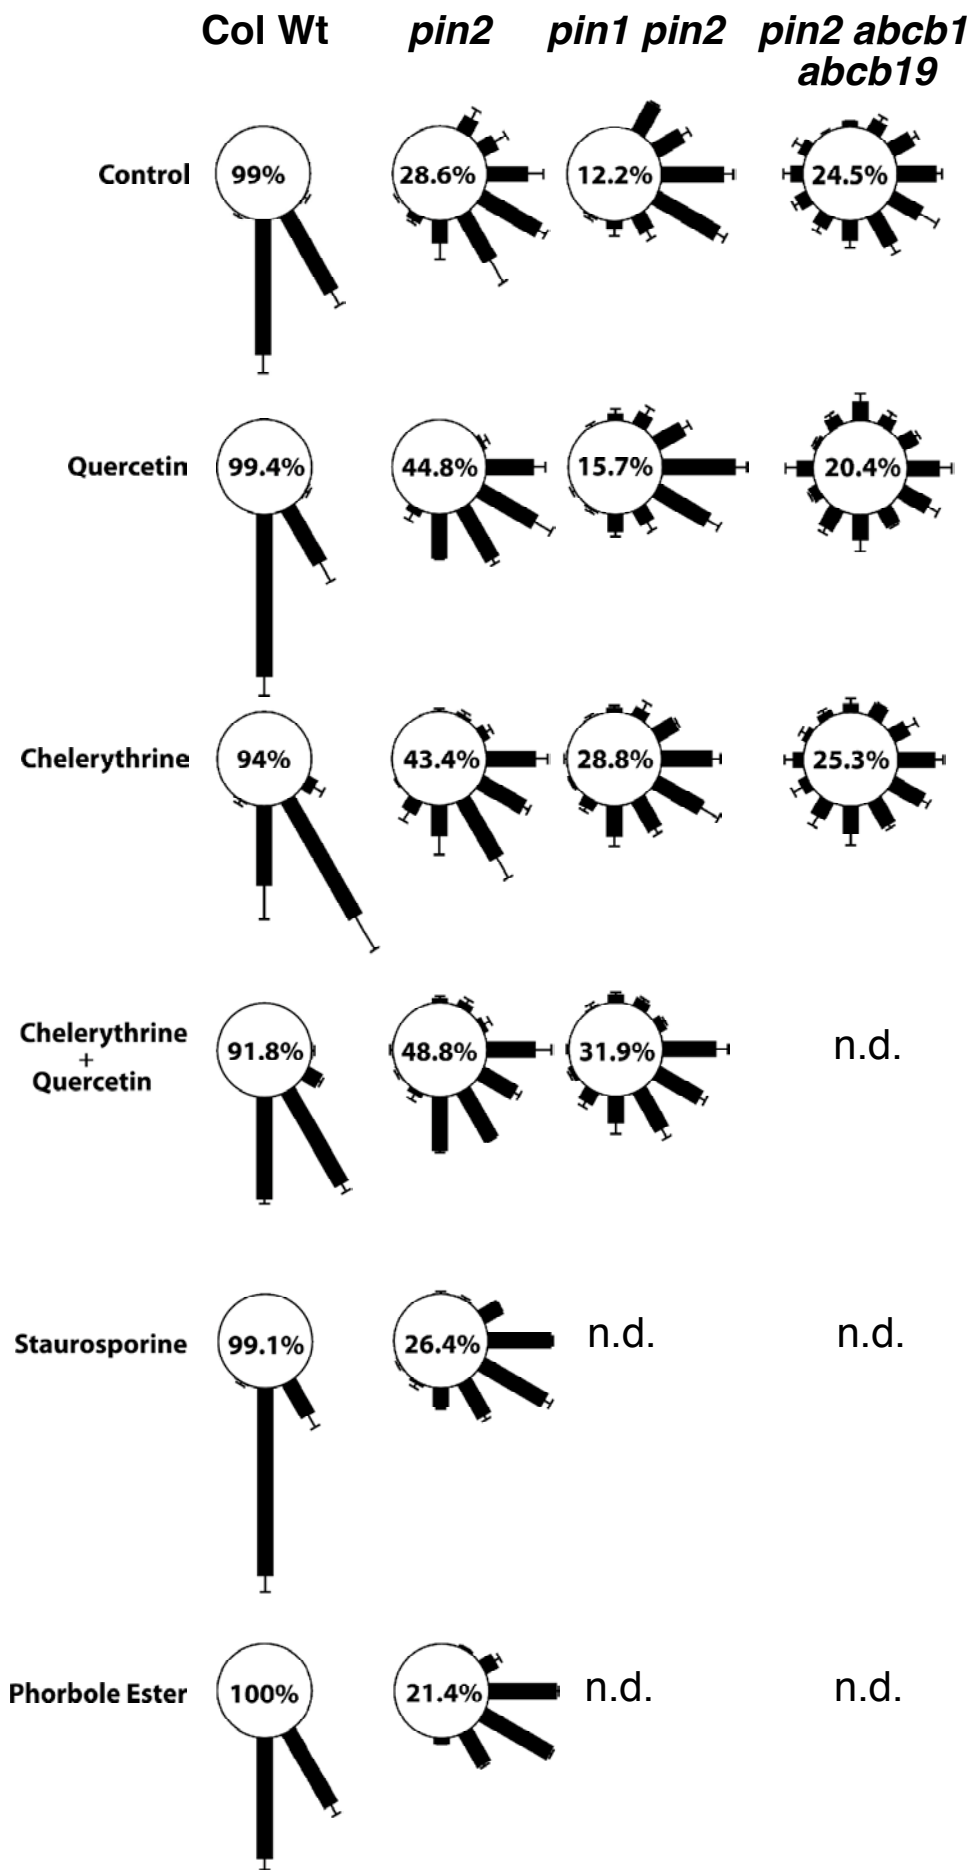

Henrichs et al. Fig. S6

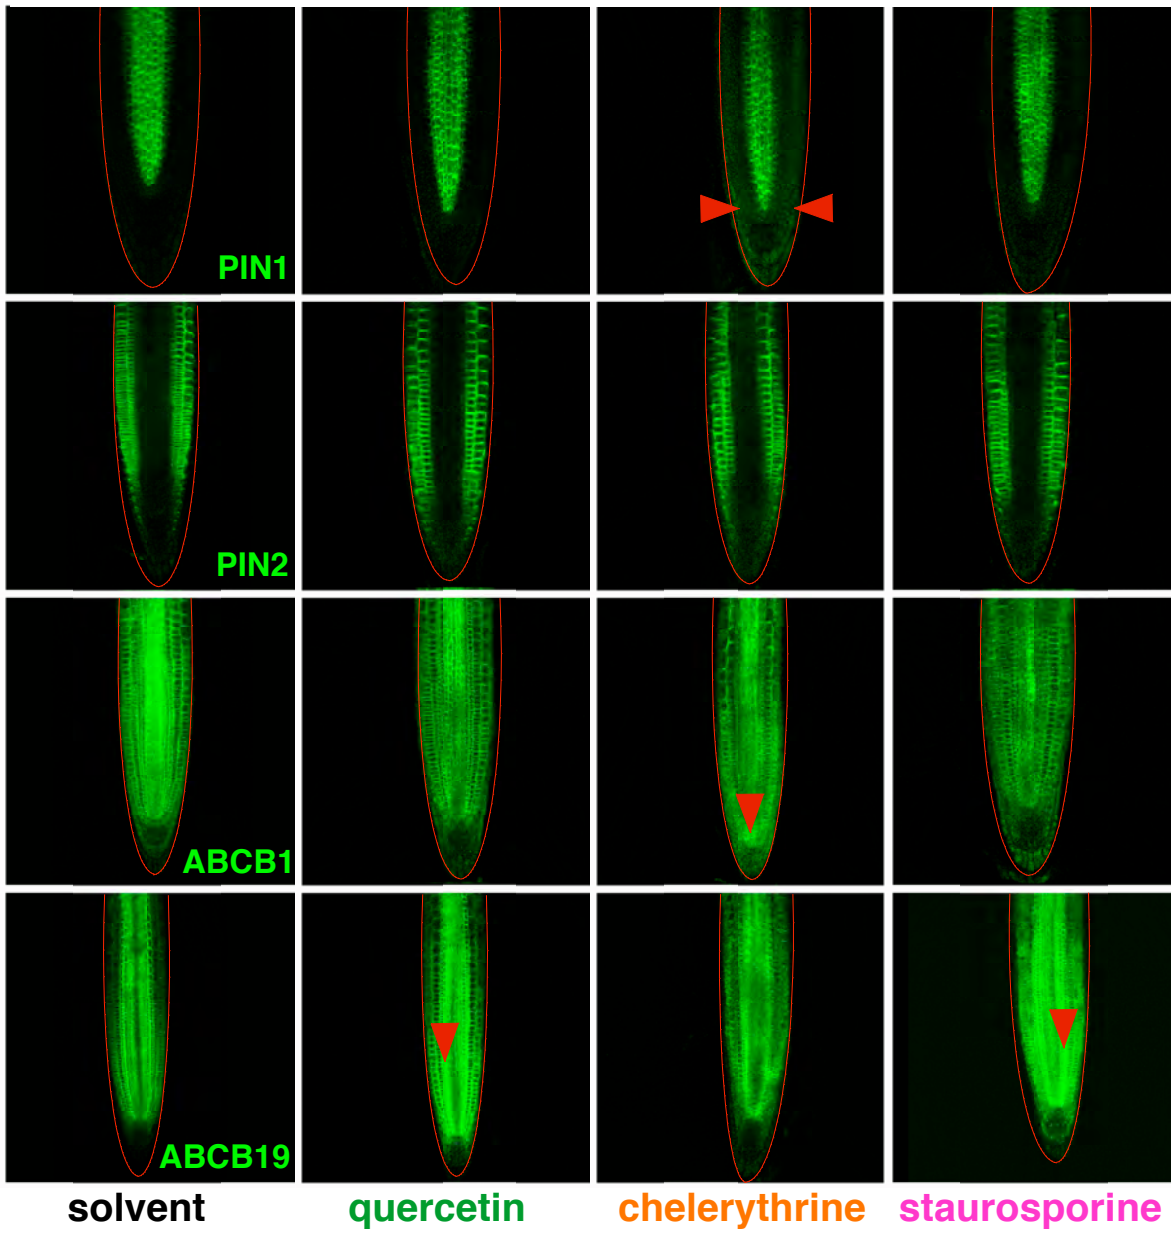

Henrichs et al. Fig. S7

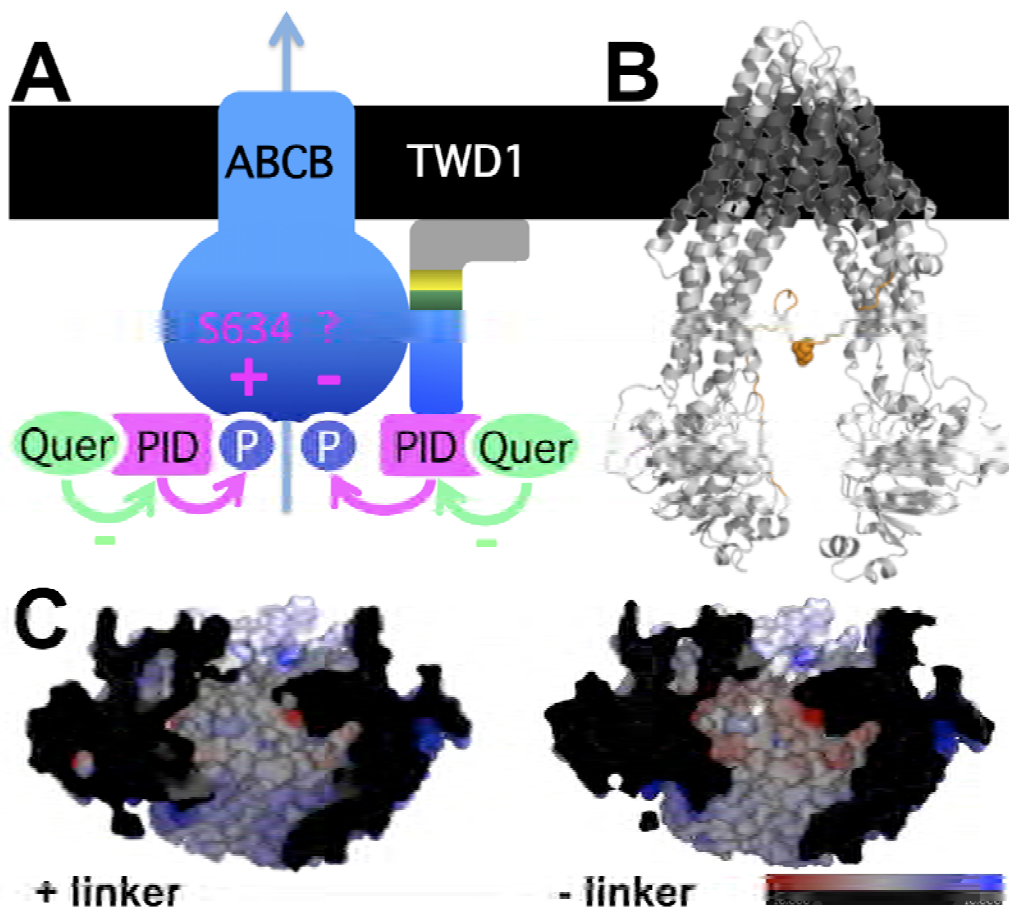

Henrichs et al. Fig. S8

Henrichs et al. Table S1

| prot_acc  | Identified Proteins in TWD1-TAP                                 | prot_score | prot_cover |
|-----------|-----------------------------------------------------------------|------------|------------|
| AT3G09260 | PYK10 (phosphate starvation-response 3.1); hydrolase            | 1813       | 50         |
| AT3G16420 | PBP1 (PYK10-BINDING PROTEIN 1)                                  | 840        | 60.1       |
| AT3G16460 | jacalin lectin family protein                                   | 614        | 32.6       |
| AT3G15730 | PLDALPHA1 (PHOSPHOLIPASE D ALPHA 1); phospholipase              | 330        | 26.9       |
| AT1G66280 | glycosyl hydrolase family 1 protein                             | 308        | 12.6       |
| ATCG00490 | large subunit of RUBISCO.                                       | 283        | 21.3       |
| AT1G54010 | myrosinase-associated protein, putative                         | 223        | 28.5       |
| AT3G21640 | <b>TWD1 (TWISTED DWARF 1); FK506 binding / peptidase</b>        | 129        | 6          |
| AT3G14210 | ESM1 (EPITHIOSPECIFIER MODIFIER 1); carboxylesterase            | 122        | 24.5       |
| AT3G16450 | jacalin lectin family protein                                   | 120        | 41         |
| AT2G39730 | <b>RCA (RUBISCO ACTIVASE)</b>                                   | 93         | 3.2        |
| AT4G33630 | EX1 (EXECUTER1)                                                 | 86         | 0.7        |
| AT3G16470 | JR1 (Jacalin lectin family protein)                             | 72         | 10.9       |
| AT3G48830 | <b>polynucleotide adenylyltransferase family protein / I</b>    | 61         | 1.1        |
| AT4G24750 | similar to rhodanese-like domain-containing protein             | 44         | 2.1        |
| AT1G54000 | myrosinase-associated protein, putative                         | 43         | 7.9        |
| AT5G26280 | mepirin and TRAF homology domain-containing protein             | 41         | 16.9       |
| AT1G58270 | ZW9                                                             | 40         | 3.8        |
| AT1G80450 | VQ motif-containing protein                                     | 39         | 2.8        |
| AT2G27120 | POL2B/TIL2 (TILTED2); DNA-directed DNA polymerase               | 39         | 0.2        |
| AT2G47300 | ribonuclease P                                                  | 39         | 0.6        |
| AT3G20370 | mepirin and TRAF homology domain-containing protein             | 38         | 7.1        |
| AT4G25920 | similar to unknown protein [Arabidopsis thaliana] (T,)          | 38         | 4.1        |
| AT1G52570 | PLDALPHA2 (PHOSPHOLIPASE D ALPHA 2); phospholipase              | 35         | 4.6        |
| AT5G10720 | <b>AHK5 (CYTOKININ INDEPENDENT 2)</b>                           | 34         | 1.2        |
| AT2G25980 | jacalin lectin family protein                                   | 33         | 3.3        |
| AT2G34650 | <b>PID (PINOID); kinase</b>                                     | 32         | 3          |
| AT2G30020 | <b>protein phosphatase 2C, putative / PP2C, putative</b>        | 32         | 2.5        |
| AT3G14270 | phosphatidylinositol-4-phosphate 5-kinase family protein        | 30         | 0.4        |
| AT1G01360 | similar to unknown protein [Arabidopsis thaliana] (T,)          | 30         | 2.7        |
| AT3G62110 | glycoside hydrolase family 28 protein / polygalacturonase       | 30         | 1.1        |
| AT5G28910 | similar to unknown protein [Arabidopsis thaliana] (T,)          | 30         | 2.2        |
| AT1G33240 | AT-GTL1 (Arabidopsis thaliana GT2-like 1); transcription factor | 30         | 1.2        |
| AT4G37460 | binding                                                         | 29         | 0.8        |
| AT1G47765 | F-box family protein                                            | 28         | 1.6        |
| AT3G54230 | nucleic acid binding                                            | 28         | 0.8        |
| AT2G18850 | similar to SET domain-containing protein [Arabidopsis thaliana] | 28         | 4.2        |
| AT2G39190 | ATATH8 (ABC2 homolog 8)                                         | 28         | 2.2        |
| AT4G01650 | similar to unknown protein [Arabidopsis thaliana] (T,)          | 27         | 5.9        |
| AT1G70840 | MLP31 (MLP-LIKE PROTEIN 31)                                     | 27         | 11.1       |

## Henrichs et al. Table S1

|           |                                                         |    |      |
|-----------|---------------------------------------------------------|----|------|
| AT1G27190 | leucine-rich repeat transmembrane protein kinase, p     | 26 | 3.8  |
| AT2G29480 | ATGSTU2 (GLUTATHIONE S-TRANSFERASE 20); i               | 26 | 5.8  |
| AT5G61280 | remorin family protein                                  | 26 | 1.9  |
| AT2G27170 | TTN7 (TITAN7); ATP binding                              | 25 | 1.1  |
| AT1G61010 | CPSF73-I; protein binding                               | 25 | 1.3  |
| AT1G06470 | phosphate translocator-related                          | 24 | 2.4  |
| AT4G00750 | dehydration-responsive family protein                   | 24 | 1.7  |
| AT4G38825 | similar to auxin-responsive protein, putative [Arabid   | 24 | 12.4 |
| AT1G49240 | ACT8 (ACTIN 8); structural constituent of cytoskele     | 24 | 3.2  |
| AT5G43020 | leucine-rich repeat transmembrane protein kinase, p     | 24 | 2.7  |
| AT2G33040 | ATP synthase gamma chain, mitochondrial (ATPC)          | 23 | 2.8  |
| AT3G45610 | Dof-type zinc finger domain-containing protein          | 23 | 3.7  |
| AT1G71390 | disease resistance family protein / LRR family prote    | 23 | 1.7  |
| AT5G53670 | similar to hypothetical protein [Vitis vinifera] (GB:C) | 23 | 2.9  |
| AT5G67100 | ICU2 (INCURVATA2); DNA-directed DNA polymeras           | 23 | 1.4  |
| AT2G23390 | similar to hypothetical protein OsI_015489 [Oryza se    | 23 | 1.1  |
| AT3G01680 | similar to unknown protein [Arabidopsis thaliana] (T,   | 22 | 1.5  |
| AT2G36740 | ATSWC2/SWC2; DNA binding                                | 22 | 6.3  |
| AT4G14310 | similar to hypothetical protein OsI_009189 [Oryza se    | 21 | 2.1  |
| AT4G14385 | similar to unnamed protein product [Vitis vinifera] ((  | 21 | 12.9 |

Henrichs et al. Table S1

| prot_acc  | Identified Proteins in vector control                       | prot_score | prot_cover |
|-----------|-------------------------------------------------------------|------------|------------|
| AT3G09260 | PYK10 (phosphate starvation-response 3.1); hydrolase, hyc   | 2040       | 55.5       |
| AT3G15730 | PLDALPHA1 (PHOSPHOLIPASE D ALPHA 1); phospholipa            | 895        | 43.3       |
| AT3G16420 | PBP1 (PYK10-BINDING PROTEIN 1)                              | 519        | 55.4       |
| AT1G66280 | glycosyl hydrolase family 1 protein                         | 355        | 12.6       |
| AT3G16460 | jacalin lectin family protein                               | 323        | 23.3       |
| AT3G16470 | JR1 (Jacalin lectin family protein)                         | 178        | 25.1       |
| AT3G01670 | similar to unknown protein [Arabidopsis thaliana] (TAIR:AT  | 171        | 13.7       |
| AT1G52400 | BGL1 (BETA-GLUCOSIDASE HOMOLOG 1); hydrolase, hy            | 169        | 13.6       |
| AT3G14210 | ESM1 (EPITHIOSPECIFIER MODIFIER 1); carboxylesterase        | 159        | 15.8       |
| ATCG00490 | large subunit of RUBISCO.                                   | 158        | 16.3       |
| AT1G52570 | PLDALPHA2 (PHOSPHOLIPASE D ALPHA 2); phospholipas           | 153        | 6.9        |
| AT1G54010 | myrosinase-associated protein, putative                     | 129        | 20.5       |
| AT5G26280 | mepirin and TRAF homology domain-containing protein / M     | 81         | 8.9        |
| AT4G33630 | EX1 (EXECUTER1)                                             | 81         | 0.7        |
| AT3G20370 | mepirin and TRAF homology domain-containing protein / M     | 71         | 7.7        |
| AT3G16450 | jacalin lectin family protein                               | 53         | 13.7       |
| AT3G01680 | similar to unknown protein [Arabidopsis thaliana] (TAIR:AT  | 51         | 6.4        |
| AT4G24750 | similar to rhodanese-like domain-containing protein [Arabi  | 47         | 2.1        |
| AT1G54000 | myrosinase-associated protein, putative                     | 37         | 9          |
| AT1G58270 | ZW9                                                         | 37         | 3.8        |
| AT2G27120 | POL2B/TIL2 (TILTED2); DNA-directed DNA polymerase           | 35         | 0.2        |
| AT2G47300 | ribonuclease P                                              | 35         | 0.6        |
| AT1G29120 | similar to unknown protein [Arabidopsis thaliana] (TAIR:AT  | 32         | 1.1        |
| AT1G50030 | TOR (TARGET OF RAPAMYCIN)                                   | 32         | 0.2        |
| AT1G80450 | VQ motif-containing protein                                 | 32         | 2.8        |
| AT2G20240 | similar to unknown protein [Arabidopsis thaliana] (TAIR:AT  | 32         | 0.8        |
| AT1G06170 | basic helix-loop-helix (bHLH) family protein                | 32         | 2.6        |
| AT4G01650 | similar to unknown protein [Arabidopsis thaliana] (TAIR:AT  | 31         | 5.9        |
| AT1G52000 | jacalin lectin family protein                               | 30         | 1.8        |
| AT2G33040 | ATP synthase gamma chain, mitochondrial (ATPC)              | 29         | 2.8        |
| AT1G32375 | F-box family protein                                        | 28         | 2.6        |
| AT3G50820 | PSBO-2/PSBO2 (PHOTOSYSTEM II SUBUNIT O-2); oxyg             | 28         | 10.6       |
| AT1G48370 | YSL8 (YELLOW STRIPE LIKE 8); oligopeptide transporter       | 27         | 1.5        |
| AT3G16940 | calmodulin-binding protein                                  | 26         | 1.2        |
| AT4G25920 | similar to unknown protein [Arabidopsis thaliana] (TAIR:AT  | 26         | 4.1        |
| AT1G01360 | similar to unknown protein [Arabidopsis thaliana] (TAIR:AT  | 25         | 2.7        |
| AT3G62110 | glycoside hydrolase family 28 protein / polygalacturonase ( | 25         | 1.1        |
| AT5G38750 | asparaginyl-tRNA synthetase family                          | 25         | 4.4        |
| AT5G28910 | similar to unknown protein [Arabidopsis thaliana] (TAIR:AT  | 25         | 2.2        |
| AT5G19950 | similar to unknown protein [Arabidopsis thaliana] (TAIR:AT  | 24         | 4.1        |



Henrichs et al. Table S1

|           |                                                              |    |     |
|-----------|--------------------------------------------------------------|----|-----|
| AT2G36240 | binding                                                      | 24 | 5   |
| AT1G64530 | RWP-RK domain-containing protein                             | 23 | 2   |
| AT1G53880 | GTP binding / translation initiation factor                  | 23 | 1.7 |
| AT2G25980 | jacalin lectin family protein                                | 22 | 3.1 |
| AT2G23390 | similar to hypothetical protein OsI_015489 [Oryza sativa (ir | 22 | 1.1 |
| AT2G35110 | GRL/NAP1/NAPP (NCK-ASSOCIATED PROTEIN); transc               | 22 | 1.4 |
| AT1G50140 | ATPase                                                       | 22 | 0.5 |
| AT3G05050 | protein kinase family protein                                | 22 | 0.8 |
| AT1G09440 | protein kinase family protein                                | 21 | 2.1 |
| AT5G53670 | similar to hypothetical protein [Vitis vinifera] (GB:CAN8120 | 21 | 2.9 |
