# Supplementary material
Source: PubMed Central journal article supplement (PMC3395086)
Supplement: emboj2012120s2.pdf [file emboj2012120s2.pdf]

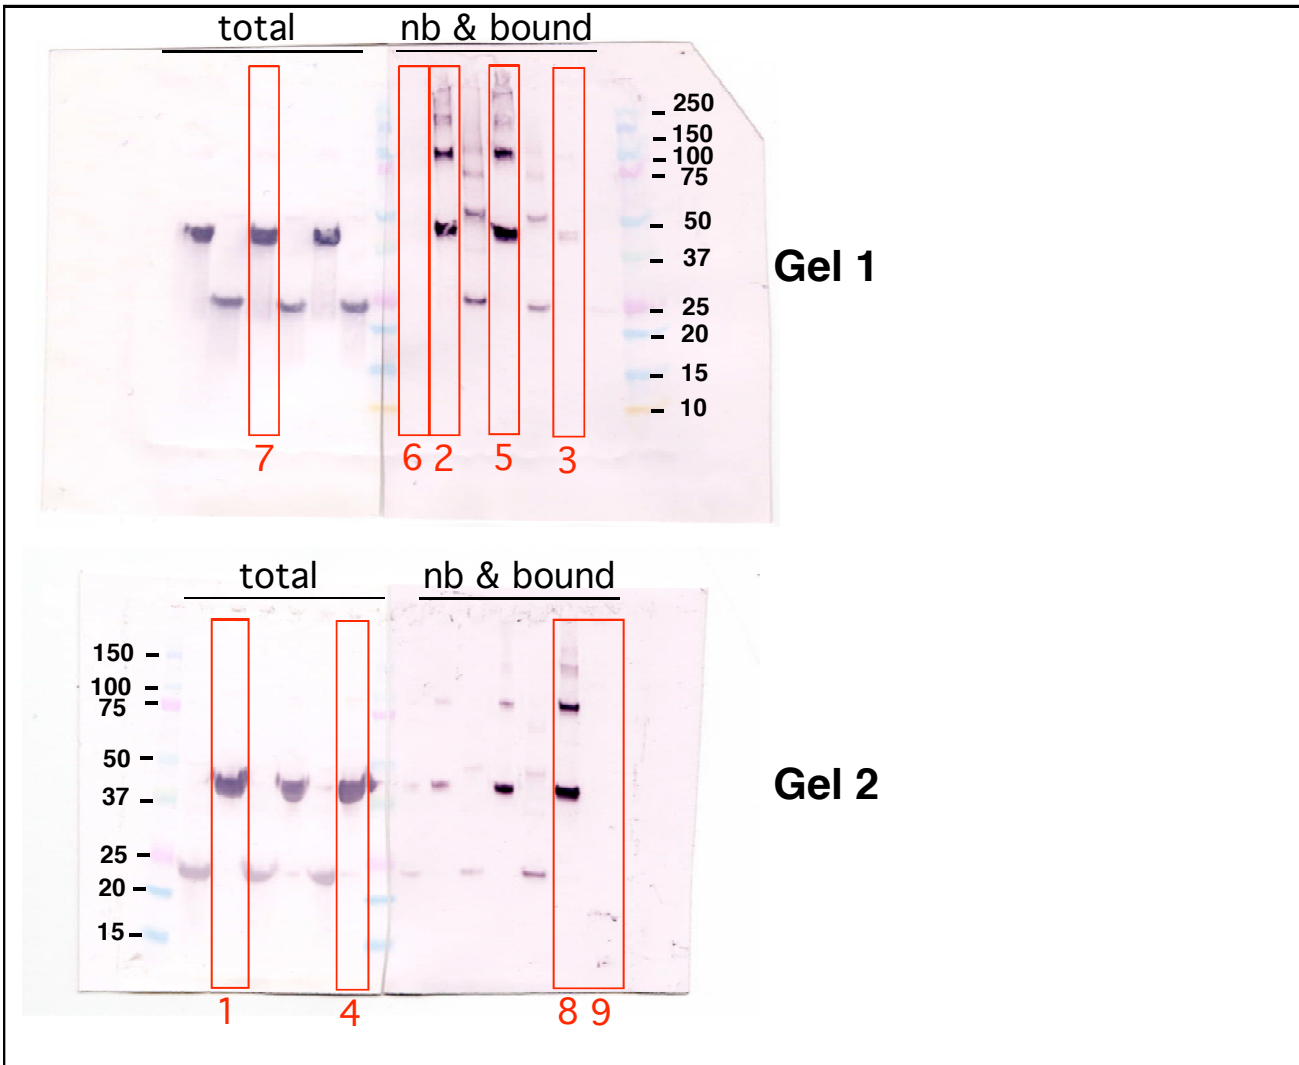

**Source data Fig. 1E:** Equal volumes of total, bound and non-bound (nb) proteins of a PID-GST chromatography were separated on two 4-20% gels that were run, blotted and developed in parallel. Gels were cut in the middle allowing longer Western development for nb & bound samples. Note that these halves of gel 1 and gel 2 were treated identically. Both gels were transformed into black and white and contrast and brightness of entire gels was adjusted equally, demonstrated by similar signals of total proteins. Corresponding lanes were cut out (red boxes) and pasted into Fig. 1E where borders are indicated by hairlines; numbers of cut Western pieces correspond to lane numbers of Fig.1E and are indicated.
