# Supplementary material
Source: PubMed Central journal article supplement (PMC3395086)
Supplement: emboj2012120s3.pdf [file emboj2012120s3.pdf]

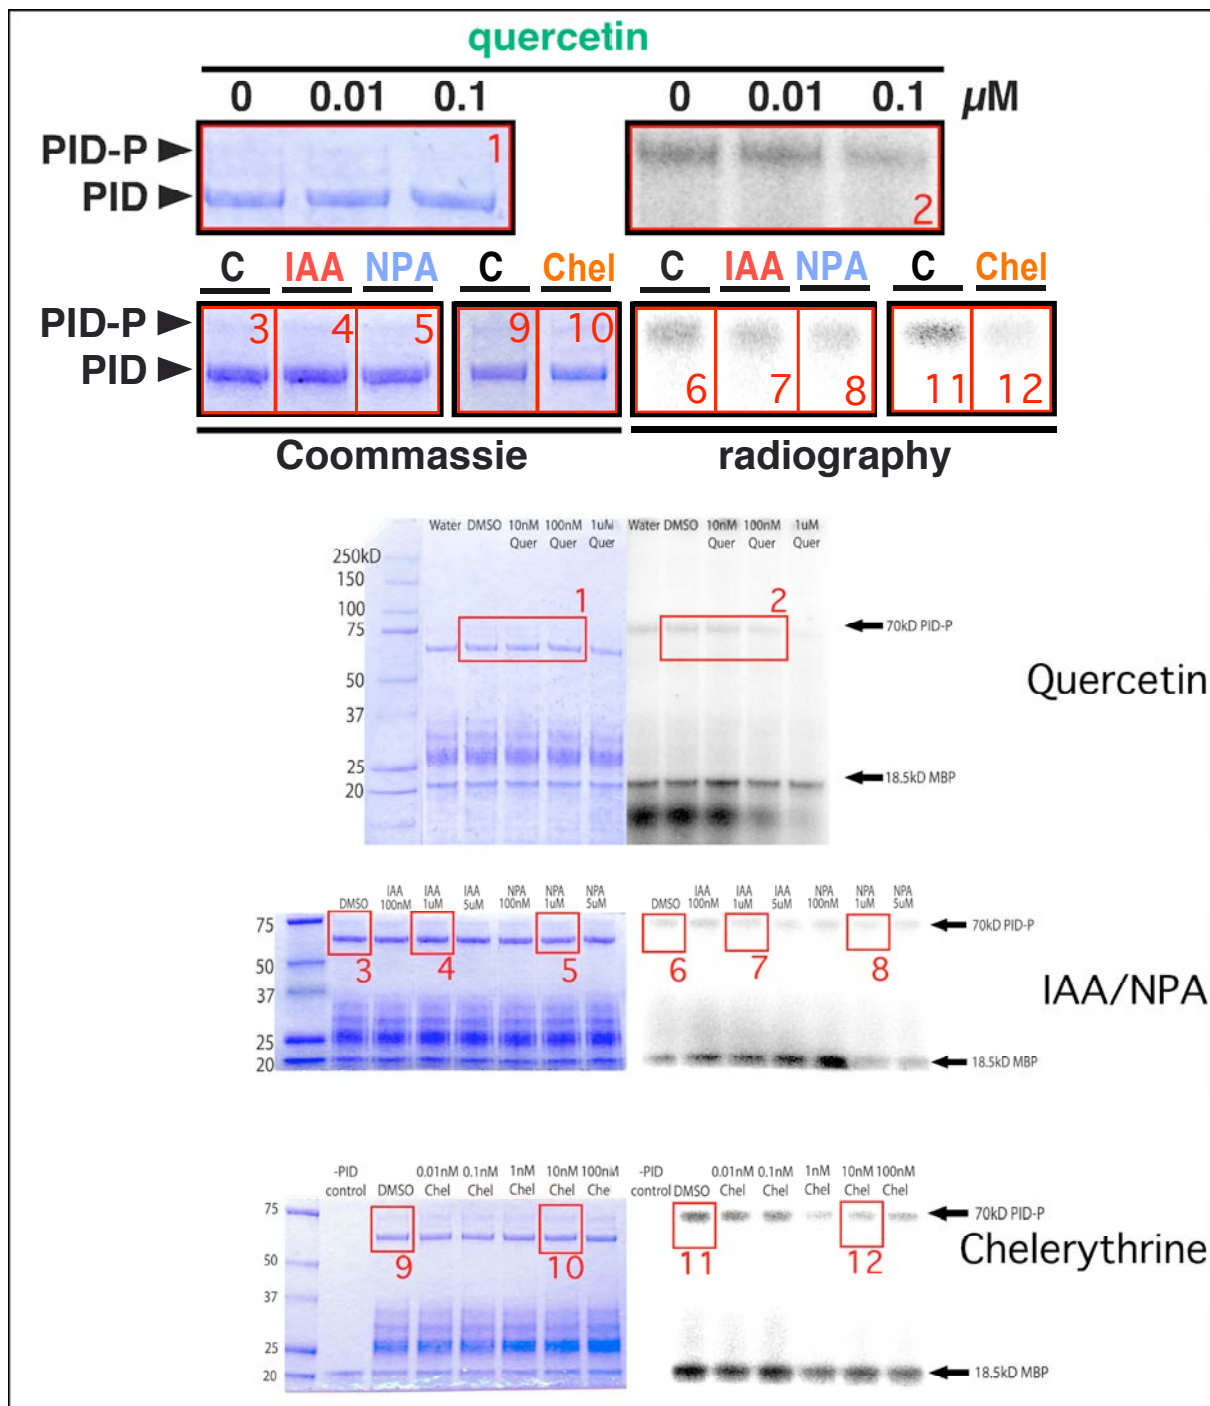

**Source data Fig. 5A:** PID-GST autophosphorylation and PID-dependent transphosphorylation of myelin binding protein (MBP) was assayed as described in Christensen *et al*, (2000). Assays were carried out in the presence of indicated drugs or solvent (C; DMSO) and equal volumes were separated by 4-20% PAGE. Gels were Coomassie stained, dried and incorporated radiolabeled phosphate was quantified using a phosphoimager (radiography). Contrast and brightness of entire gels/ autoradiographs was adjusted equally. Corresponding lanes were cut out (red boxes) and inserted into Fig. 5A (see upper panel), where borders are indicated by hairlines.
